# Supplementary material
Source: publisher site journal article supplement (https://www.dovepress.com/article/346869)
Supplement: Supplementary file 1 [file get_supplementary_file.php]

## Supplementary materials

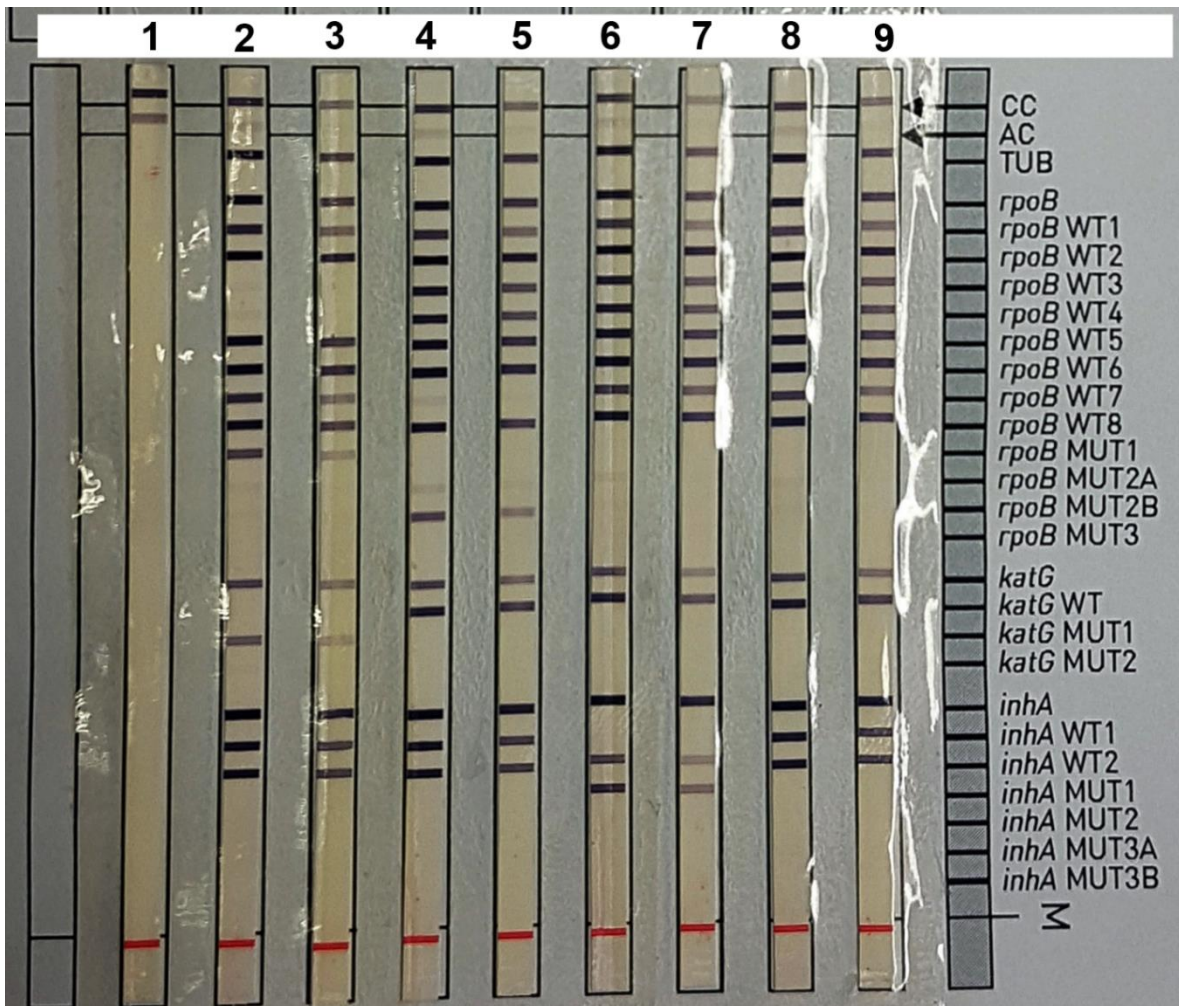

**Supplementary Figure S1:** Genotypic drug resistance profiles of MTB samples by the GenoType MTBDRplus assay. Lane 1; negative control, lane 2 and 3; MDR, lane 4 and 5; RIF-R, lane 6 and 7; INH-R, lane 8 and 9; H37Rv.

**Supplementary Table S1** Phenotypic drug resistance profiles of MTB samples by the GenoType MTBDRplus assay.

| Sample  | Control | INH | RIF | STM | ETM | PNB | Result               |
|---------|---------|-----|-----|-----|-----|-----|----------------------|
| 1.H37Rv | 4+      | S   | S   | S   | S   | S   | Drug susceptible     |
|         | 3+      | S   | S   | S   | S   | S   |                      |
| 2.H37Rv | 4+      | S   | S   | S   | S   | S   | Drug susceptible     |
|         | 3+      | S   | S   | S   | S   | S   |                      |
| 3.INH-R | 4+      | 4+  | S   | S   | S   | S   | Isoniazid resistance |
|         | 3+      | 3+  | S   | S   | S   | S   |                      |
| 4.INH-R | 4+      | 4+  | S   | S   | S   | S   | Isoniazid resistance |
|         | 4+      | 4+  | S   | S   | S   | S   |                      |
| 5.RIF-R | 4+      | S   | 4+  | S   | S   | S   | Rifampin resistance  |
|         | 3+      | S   | 3+  | S   | S   | S   |                      |
| 6.RIF-R | 4+      | S   | 4+  | S   | S   | S   | Rifampin resistance  |
|         | 3+      | S   | 3+  | S   | S   | S   |                      |
| 7.MDR   | 4+      | 4+  | 4+  | 4+  | 4+  | S   | MDR                  |
|         | 3+      | 3+  | 3+  | 3+  | 1+  | S   |                      |
| 8.MDR   | 4+      | 4+  | 4+  | 4+  | 4+  | S   | MDR                  |
|         | 3+      | 3+  | 3+  | 3+  | 1+  | S   |                      |

**Notes:** INH; isoniazid, RIF; rifampin, STM; streptomycin, ETM; ethambutol, PNB; p-Nitrobenzoic acid, S; susceptible.

*sigA*    *hspX*    *sigE*    *tgs1*    Ladder  
116 bp   173 bp   114 bp   107 bp   50 bp

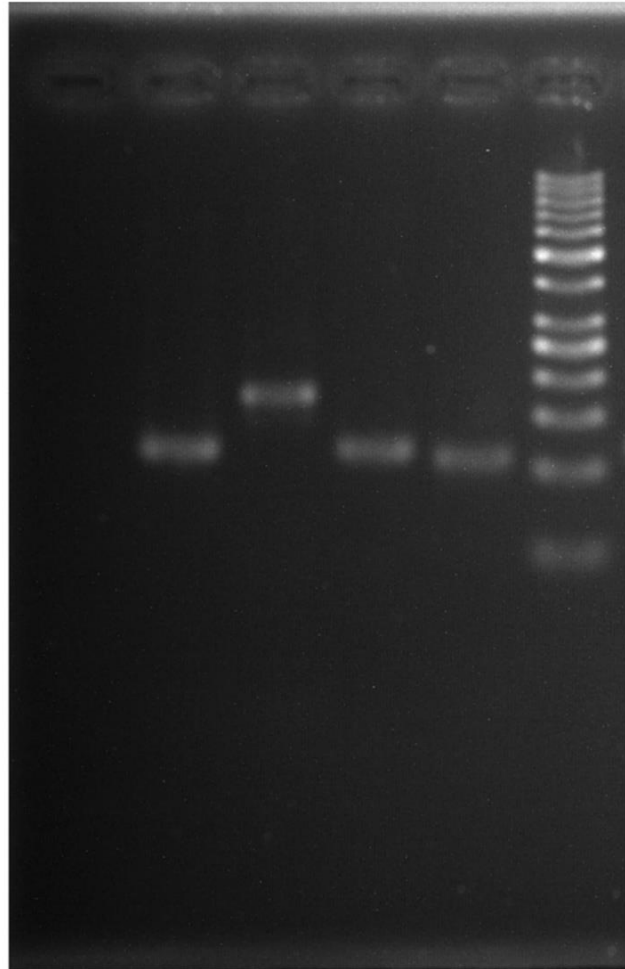

**Supplementary Figure S2:** PCR products using primers and probes target stress-related genes.

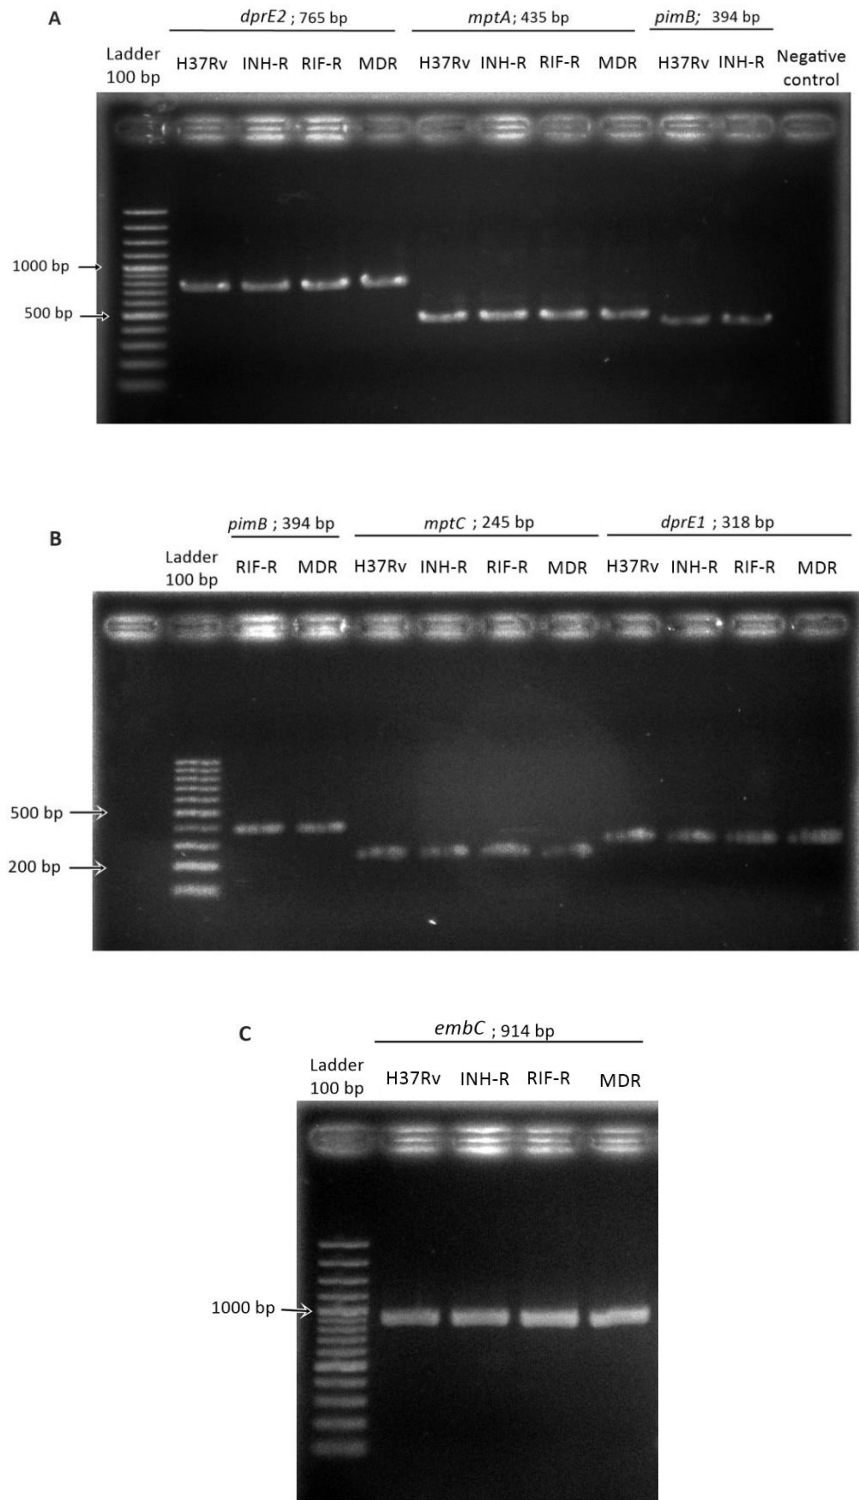

**Supplementary Figure S3: specificity of ManLAM-related gene primers (a-c)**
